# Supplementary material
Source: PubMed Central journal article supplement (PMC5984516)
Supplement: pnas.1800367115.sd01.pdf [file pnas.1800367115.sd01.pdf]

| Cable bacteria filament name | Voltage drop:                                                        |                                                                       |                           |                                                                |                                                                                   |                           | Estimate of $\frac{[Ox]^a}{[Ox]^b}$                                                                                                                                                                                                                                       |                                     |       |       |        |  |
|------------------------------|----------------------------------------------------------------------|-----------------------------------------------------------------------|---------------------------|----------------------------------------------------------------|-----------------------------------------------------------------------------------|---------------------------|---------------------------------------------------------------------------------------------------------------------------------------------------------------------------------------------------------------------------------------------------------------------------|-------------------------------------|-------|-------|--------|--|
| MarineRattekaifila01         | Width: 6,6 µm Lenght: 4,3 mm                                         |                                                                       |                           |                                                                |                                                                                   |                           | Change from near sediment, to near oxyg Normalized value of red <sup>a</sup> Red <sup>max</sup> from laser cut experiment $\frac{[Ox]^a}{[Ox]^b} = \frac{[Red]^{max} - [Red]^a}{[Red]^{max} - [Red]^b}$ Voltage drop in mV per mm using alternate $\frac{[Ox]^a}{[Ox]^b}$ |                                     |       |       |        |  |
|                              | Suboxic zone near sediment, normalized intensity (Red <sup>a</sup> ) | Suboxic zone near oxic zone, normalized intensity (Red <sup>b</sup> ) | $\frac{[Red]^a}{[Red]^b}$ | $\left(\frac{[Red]^a}{[Red]^b} / \frac{[Ox]^a}{[Ox]^b}\right)$ | $\Delta E = 59mV \ln\left(\frac{[Red]^a}{[Red]^b} / \frac{[Ox]^a}{[Ox]^b}\right)$ | Voltage drop in mV per mm |                                                                                                                                                                                                                                                                           |                                     |       |       |        |  |
| Band 750                     | 1869,698                                                             | 630,903                                                               | 2,964                     | 6,338                                                          | 47,315                                                                            | 11,004                    | 0,337                                                                                                                                                                                                                                                                     | 1,000                               | 1,946 | 0,588 | 9,637  |  |
| Band 1130                    | 761,126                                                              | 324,907                                                               | 2,343                     | 5,010                                                          | 41,291                                                                            | 9,602                     | 0,427                                                                                                                                                                                                                                                                     | 1,000                               | 1,940 | 0,621 | 7,910  |  |
| Band 1315                    | 560,181                                                              | 165,269                                                               | 3,390                     | 7,249                                                          | 50,756                                                                            | 11,804                    | 0,295                                                                                                                                                                                                                                                                     | 1,000                               | 2,060 | 0,601 | 10,311 |  |
| Band 1588                    | 373,992                                                              | 161,398                                                               | 2,317                     | 4,956                                                          | 41,011                                                                            | 9,538                     | 0,432                                                                                                                                                                                                                                                                     | 1,000                               | 1,819 | 0,590 | 8,147  |  |
| Band 1497                    | 94,530                                                               | 38,091                                                                | 2,482                     | 5,308                                                          | 42,769                                                                            | 9,946                     | 0,403                                                                                                                                                                                                                                                                     | 1,000                               | 1,916 | 0,605 | 8,407  |  |
|                              |                                                                      |                                                                       | $\frac{[Ox]^a}{[Ox]^b}$   |                                                                |                                                                                   |                           |                                                                                                                                                                                                                                                                           |                                     |       |       |        |  |
| Band 1637                    | 26,818                                                               | 57,355                                                                | 0,468                     |                                                                |                                                                                   |                           |                                                                                                                                                                                                                                                                           |                                     |       |       |        |  |
|                              |                                                                      |                                                                       |                           |                                                                |                                                                                   |                           | 0,468                                                                                                                                                                                                                                                                     | AVG                                 |       | 0,601 | 8,883  |  |
| MarineRattekaifila02         | Width: 6,4 µm Lenght: 3 mm                                           |                                                                       |                           |                                                                |                                                                                   |                           |                                                                                                                                                                                                                                                                           |                                     |       |       |        |  |
| Band 750                     | 2387,628                                                             | 878,395                                                               | 2,718                     | 5,308                                                          | 42,769                                                                            | 14,256                    | 0,368                                                                                                                                                                                                                                                                     | 1,000                               | 1,946 | 0,599 | 12,912 |  |
| Band 1130                    | 1033,668                                                             | 405,479                                                               | 2,549                     | 4,978                                                          | 41,125                                                                            | 13,708                    | 0,392                                                                                                                                                                                                                                                                     | 1,000                               | 1,940 | 0,607 | 12,252 |  |
| Band 1315                    | 816,651                                                              | 238,243                                                               | 3,428                     | 6,693                                                          | 48,713                                                                            | 16,238                    | 0,292                                                                                                                                                                                                                                                                     | 1,000                               | 2,060 | 0,600 | 14,892 |  |
| Band 1588                    | 542,154                                                              | 197,846                                                               | 2,740                     | 5,351                                                          | 42,977                                                                            | 14,326                    | 0,365                                                                                                                                                                                                                                                                     | 1,000                               | 1,819 | 0,563 | 13,511 |  |
| Band 1497                    | 144,452                                                              | 44,774                                                                | 3,226                     | 6,300                                                          | 47,160                                                                            | 15,720                    | 0,310                                                                                                                                                                                                                                                                     | 1,000                               | 1,916 | 0,570 | 14,801 |  |
|                              |                                                                      |                                                                       | $\frac{[Ox]^a}{[Ox]^b}$   |                                                                |                                                                                   |                           |                                                                                                                                                                                                                                                                           |                                     |       |       |        |  |
| Band 1637                    | 16,776                                                               | 32,757                                                                | 0,512                     |                                                                |                                                                                   |                           |                                                                                                                                                                                                                                                                           |                                     |       |       |        |  |
|                              |                                                                      |                                                                       |                           |                                                                |                                                                                   |                           | 0,512                                                                                                                                                                                                                                                                     | AVG                                 |       | 0,588 | 13,674 |  |
| MarineRattekaifila03         | Width: 6,3 µm Lenght: 3 mm                                           |                                                                       |                           |                                                                |                                                                                   |                           |                                                                                                                                                                                                                                                                           |                                     |       |       |        |  |
| Band 750                     | 1623,592                                                             | 861,891                                                               | 1,884                     | 2,754                                                          | 25,954                                                                            | 8,651                     | 0,531                                                                                                                                                                                                                                                                     | 1,000                               | 1,946 | 0,668 | 8,849  |  |
| Band 1130                    | 704,585                                                              | 419,649                                                               | 1,679                     | 2,454                                                          | 23,005                                                                            | 7,668                     | 0,596                                                                                                                                                                                                                                                                     | 1,000                               | 1,940 | 0,699 | 7,482  |  |
| Band 1315                    | 550,258                                                              | 228,687                                                               | 2,406                     | 3,517                                                          | 32,226                                                                            | 10,742                    | 0,416                                                                                                                                                                                                                                                                     | 1,000                               | 2,060 | 0,645 | 11,249 |  |
| Band 1588                    | 402,769                                                              | 209,304                                                               | 1,924                     | 2,813                                                          | 26,500                                                                            | 8,833                     | 0,520                                                                                                                                                                                                                                                                     | 1,000                               | 1,819 | 0,630 | 9,531  |  |
| Band 1497                    | 94,821                                                               | 51,681                                                                | 1,835                     | 2,682                                                          | 25,278                                                                            | 8,426                     | 0,545                                                                                                                                                                                                                                                                     | 1,000                               | 1,916 | 0,668 | 8,629  |  |
|                              |                                                                      |                                                                       | $\frac{[Ox]^a}{[Ox]^b}$   |                                                                |                                                                                   |                           |                                                                                                                                                                                                                                                                           |                                     |       |       |        |  |
| Band 1637                    | 40,429                                                               | 59,097                                                                | 0,684                     |                                                                |                                                                                   |                           |                                                                                                                                                                                                                                                                           |                                     |       |       |        |  |
|                              |                                                                      |                                                                       |                           |                                                                |                                                                                   |                           | 0,684                                                                                                                                                                                                                                                                     | AVG                                 |       | 0,662 | 9,148  |  |
| MarineRattekaifila04         | Width: 6,5 µm Lenght: 2,7 mm                                         |                                                                       |                           |                                                                |                                                                                   |                           |                                                                                                                                                                                                                                                                           |                                     |       |       |        |  |
| Band 750                     | 1983,237                                                             | 1217,058                                                              | 1,630                     | 4,380                                                          | 37,846                                                                            | 14,017                    | 0,614                                                                                                                                                                                                                                                                     | 1,000                               | 1,946 | 0,710 | 7,884  |  |
| Band 1130                    | 855,210                                                              | 380,704                                                               | 2,246                     | 6,038                                                          | 46,071                                                                            | 17,063                    | 0,445                                                                                                                                                                                                                                                                     | 1,000                               | 1,940 | 0,629 | 12,083 |  |
| Band 1315                    | 649,362                                                              | 273,867                                                               | 2,371                     | 6,373                                                          | 47,456                                                                            | 17,576                    | 0,422                                                                                                                                                                                                                                                                     | 1,000                               | 2,060 | 0,647 | 12,324 |  |
| Band 1588                    | 435,210                                                              | 171,092                                                               | 2,544                     | 6,837                                                          | 49,257                                                                            | 18,243                    | 0,393                                                                                                                                                                                                                                                                     | 1,000                               | 1,819 | 0,575 | 14,120 |  |
| Band 1497                    | 97,567                                                               | 49,944                                                                | 1,954                     | 5,251                                                          | 42,492                                                                            | 15,738                    | 0,512                                                                                                                                                                                                                                                                     | 1,000                               | 1,916 | 0,652 | 10,409 |  |
|                              |                                                                      |                                                                       | $\frac{[Ox]^a}{[Ox]^b}$   |                                                                |                                                                                   |                           |                                                                                                                                                                                                                                                                           |                                     |       |       |        |  |
| Band 1637                    | 4,816                                                                | 12,943                                                                | 0,372                     |                                                                |                                                                                   |                           |                                                                                                                                                                                                                                                                           |                                     |       |       |        |  |
|                              |                                                                      |                                                                       |                           |                                                                |                                                                                   |                           | 0,372                                                                                                                                                                                                                                                                     | AVG                                 |       | 0,643 | 11,364 |  |
| MarineRattekaifila06         | Width: 4,7 µm Lenght: 3,3 mm                                         |                                                                       |                           |                                                                |                                                                                   |                           |                                                                                                                                                                                                                                                                           |                                     |       |       |        |  |
| Band 750                     | 868,243                                                              | 307,248                                                               | 2,826                     | 12,660                                                         | 65,043                                                                            | 19,710                    | 0,354                                                                                                                                                                                                                                                                     | 1,000                               | 1,946 | 0,594 | 12,109 |  |
| Band 1130                    | 383,667                                                              | 143,133                                                               | 2,680                     | 12,009                                                         | 63,690                                                                            | 19,300                    | 0,373                                                                                                                                                                                                                                                                     | 1,000                               | 1,940 | 0,600 | 11,624 |  |
| Band 1315                    | 258,625                                                              | 73,554                                                                | 3,516                     | 15,752                                                         | 70,643                                                                            | 21,407                    | 0,284                                                                                                                                                                                                                                                                     | 1,000                               | 2,060 | 0,597 | 13,767 |  |
| Band 1588                    | 174,631                                                              | 64,894                                                                | 2,691                     | 12,056                                                         | 63,791                                                                            | 19,330                    | 0,372                                                                                                                                                                                                                                                                     | 1,000                               | 1,819 | 0,566 | 12,106 |  |
| Band 1497                    | 53,723                                                               | 25,730                                                                | 2,088                     | 9,354                                                          | 57,289                                                                            | 17,360                    | 0,479                                                                                                                                                                                                                                                                     | 1,000                               | 1,916 | 0,637 | 9,214  |  |
|                              |                                                                      |                                                                       | $\frac{[Ox]^a}{[Ox]^b}$   |                                                                |                                                                                   |                           |                                                                                                                                                                                                                                                                           |                                     |       |       |        |  |
| Band 1637                    | 9,341                                                                | 41,848                                                                | 0,223                     |                                                                |                                                                                   |                           |                                                                                                                                                                                                                                                                           |                                     |       |       |        |  |
|                              |                                                                      |                                                                       |                           |                                                                |                                                                                   |                           | 0,223                                                                                                                                                                                                                                                                     | AVG                                 |       | 0,599 | 11,764 |  |
| MarineRattekaifila07         | Width: 5,7 µm Lenght: 2,1 mm                                         |                                                                       |                           |                                                                |                                                                                   |                           |                                                                                                                                                                                                                                                                           |                                     |       |       |        |  |
| Band 750                     | 772,395                                                              | 197,212                                                               | 3,917                     | 5,924                                                          | 45,586                                                                            | 21,707                    | 0,255                                                                                                                                                                                                                                                                     | 1,000                               | 1,946 | 0,560 | 23,743 |  |
| Band 1130                    | 761,126                                                              | 324,907                                                               | 2,343                     | 3,543                                                          | 32,416                                                                            | 15,436                    | 0,427                                                                                                                                                                                                                                                                     | 1,000                               | 1,940 | 0,621 | 16,196 |  |
| Band 1315                    | 560,181                                                              | 165,269                                                               | 3,390                     | 5,127                                                          | 41,882                                                                            | 19,944                    | 0,295                                                                                                                                                                                                                                                                     | 1,000                               | 2,060 | 0,601 | 21,114 |  |
| Band 1588                    | 373,992                                                              | 161,398                                                               | 2,317                     | 3,505                                                          | 32,137                                                                            | 15,303                    | 0,432                                                                                                                                                                                                                                                                     | 1,000                               | 1,819 | 0,590 | 16,683 |  |
| Band 1497                    | 94,530                                                               | 38,091                                                                | 2,482                     | 3,754                                                          | 33,894                                                                            | 16,140                    | 0,403                                                                                                                                                                                                                                                                     | 1,000                               | 1,916 | 0,605 | 17,215 |  |
|                              |                                                                      |                                                                       | $\frac{[Ox]^a}{[Ox]^b}$   |                                                                |                                                                                   |                           |                                                                                                                                                                                                                                                                           |                                     |       |       |        |  |
| Band 1637                    | 56,367                                                               | 85,262                                                                | 0,661                     |                                                                |                                                                                   |                           |                                                                                                                                                                                                                                                                           |                                     |       |       |        |  |
|                              |                                                                      |                                                                       |                           |                                                                |                                                                                   |                           | 0,661                                                                                                                                                                                                                                                                     | Std Red <sup>max</sup>              | 0,077 |       |        |  |
|                              |                                                                      |                                                                       |                           |                                                                |                                                                                   |                           |                                                                                                                                                                                                                                                                           | AVG                                 |       | 0,595 | 18,990 |  |
|                              |                                                                      |                                                                       |                           |                                                                |                                                                                   |                           |                                                                                                                                                                                                                                                                           | Avg voltage drop in                 |       |       |        |  |
|                              |                                                                      |                                                                       |                           |                                                                |                                                                                   |                           |                                                                                                                                                                                                                                                                           | 0,487 mV per mm                     |       | 0,615 | 12,304 |  |
|                              |                                                                      |                                                                       |                           |                                                                |                                                                                   |                           |                                                                                                                                                                                                                                                                           | 0,160 std                           |       | 0,037 | 3,833  |  |
|                              |                                                                      |                                                                       |                           |                                                                |                                                                                   |                           |                                                                                                                                                                                                                                                                           | Average $\frac{[Ox]^a}{[Ox]^b}$ std |       |       |        |  |
|                              |                                                                      |                                                                       |                           |                                                                |                                                                                   |                           |                                                                                                                                                                                                                                                                           | 14,625                              |       |       |        |  |
|                              |                                                                      |                                                                       |                           |                                                                |                                                                                   |                           |                                                                                                                                                                                                                                                                           | 4,101                               |       |       |        |  |
